# Supplementary material for: Host–Pathogen Interactions in Leaf Petioles of Common Ash and Manchurian Ash Infected with Hymenoscyphus fraxineus
Source: MDPI journal article supplement (doi:10.3390/microorganisms10020375), 2022-02-05
Supplement: s1 [file s1]

Supplemental Table S1. Identification and field performance of common ash clones and Manchurian ash clones (native host) used in the study. PDS: Percent damage score of the crown. During field assessments, crown damage is scored in classes and class mean averages across five years are given in the table. For Tapsøre the score is an average across the years 2011-2015 and for Randers from 2013-2017. The Manchurian ash from the Arboretum Hørsholm was only scored in 2013.

| Clone Name  | Trial                 | ID          | Coordinate position in field trials | PDS (%) | Classification in field |
|-------------|-----------------------|-------------|-------------------------------------|---------|-------------------------|
| 35          | FP281<br>Tapsøre      | 35          | 08;03                               | 5       | Less susceptible        |
| 14165       | F384<br>Randers       | S14165      | 14;08                               | 8       | Less susceptible        |
| 40          | FP281<br>Tapsøre      | 40          | 08;17                               | 34      | Susceptible             |
| 27x         | FP281<br>Tapsøre      | 27x         | 01;17                               | 18      | Susceptible             |
| 1989-0095-4 | Arboretum<br>Hørsholm | 1989-0095-4 | 1603;1511                           | 0       | Less susceptible        |
